# Supplementary material for: Healthcare seeking for chronic illness among adult slum dwellers in Bangladesh: A descriptive cross-sectional study in two urban settings
Source: PubMed Central journal article supplement (PMC7295220; doi:10.1371/journal.pone.0233635), 2020-06-15
Supplement: pone.0233635.s001.pdf [file pone.0233635.s001.pdf]

HOUSEHOLD IDENTIFICATION

City Corporation:.....  
 Cluster Number.....  
 Household Number.....  
 Type of Household: 1. Family 2. Mess  
 Name of The Household Head.....  
 Name of The Respondent.....

Household Gps Location:

\_\_\_\_\_

INTERVIEW DETAILS

Interviewer Code:  
 Result  
 1<sup>st</sup> Visits: \_\_\_/\_\_\_/\_\_\_ Start Time: \_\_\_:\_\_\_ End Time:\_\_\_:\_\_\_  
 2<sup>nd</sup> Visits: \_\_\_/\_\_\_/\_\_\_ Start Time: \_\_\_:\_\_\_ End Time:\_\_\_:\_\_\_  
 3<sup>rd</sup> Visits: \_\_\_/\_\_\_/\_\_\_ Start Time: \_\_\_:\_\_\_ End Time:\_\_\_:\_\_\_

Interview Completed

1. Yes
2. No

Cross Checker Name:

Date of Cross Check: \_\_\_/\_\_\_/\_\_\_

Supervisor: \_\_\_\_\_

Field Editor: \_\_\_\_\_

Date: \_\_\_/\_\_\_/\_\_\_

Date: \_\_\_/\_\_\_/\_\_\_

Remarks

সরবরাহকৃত খানার তালিকায় খানার জরিপের ফলাফল নির্দেশ করুন

Healthcare Seeking Behavior Among the Urban Poor in Bangladesh, 2013  
Screening Questionnaire for Household Membership Listing

\*Eligibility Criteria (Code):

- 1= Individual Respondent Module (For All)  
 2= Health Care Seeking Behavior Module (15 yr and Above)  
 3= Not Eligible

| SL  | 101  | 102        | 103              | 104                                                                     | 105                               | 106                                              | 106a                       | 107                                                    | 107a                                                        | 107b                            | 107b_1              | 107c                                     | 107c_1              | 107d                           | 107e                                                | 107f                     | 107g                     | 107h                              | 107i                       | 107j                  |  |
|-----|------|------------|------------------|-------------------------------------------------------------------------|-----------------------------------|--------------------------------------------------|----------------------------|--------------------------------------------------------|-------------------------------------------------------------|---------------------------------|---------------------|------------------------------------------|---------------------|--------------------------------|-----------------------------------------------------|--------------------------|--------------------------|-----------------------------------|----------------------------|-----------------------|--|
|     | Name | Sex        | Age              | Marital Status                                                          | Relation to the Household Head**  | Mother who has delivered baby within last 1 Year | Are you currently pregnant | Mother/Guardian who has living child age under 5 years | Mother/Guardian who has living child age between 5-14 years | Health problem for last 14 days | Specify the Disease | Health problem for last 3 months or more | Specify the Disease | Any physical/mental disability | If yes, have you sought treatment in last 3 months? | Unable to speak or hear? | Eligibility for Module * | Available in HH for next 2 weeks? | Available Appointment Time | Eligible for module * |  |
|     |      | 1=M<br>2=F | ----/----<br>y/m | 1. Married<br>2. Separated<br>3. Divorced<br>4. Widowed<br>5. Unmarried | See the options below the table** | 1=Yes<br>2=No<br>3=NA                            | 1=Yes<br>2=No              | 1=Yes<br>2=No<br>3=NA                                  | 1=Yes<br>2=No<br>3=NA                                       | 1=Yes<br>2=No<br>3=NA           |                     | 1=Yes<br>2=No<br>3=NA                    |                     | 1=Yes<br>2=No                  | 1=Yes<br>2=No                                       | 1=Yes<br>2=No            | See the Codes above*     |                                   |                            |                       |  |
| 1.  |      |            |                  |                                                                         |                                   |                                                  |                            |                                                        |                                                             |                                 |                     |                                          |                     |                                |                                                     |                          |                          |                                   |                            |                       |  |
| 2.  |      |            |                  |                                                                         |                                   |                                                  |                            |                                                        |                                                             |                                 |                     |                                          |                     |                                |                                                     |                          |                          |                                   |                            |                       |  |
| 3.  |      |            |                  |                                                                         |                                   |                                                  |                            |                                                        |                                                             |                                 |                     |                                          |                     |                                |                                                     |                          |                          |                                   |                            |                       |  |
| 4.  |      |            |                  |                                                                         |                                   |                                                  |                            |                                                        |                                                             |                                 |                     |                                          |                     |                                |                                                     |                          |                          |                                   |                            |                       |  |
| 5.  |      |            |                  |                                                                         |                                   |                                                  |                            |                                                        |                                                             |                                 |                     |                                          |                     |                                |                                                     |                          |                          |                                   |                            |                       |  |
| 6.  |      |            |                  |                                                                         |                                   |                                                  |                            |                                                        |                                                             |                                 |                     |                                          |                     |                                |                                                     |                          |                          |                                   |                            |                       |  |
| 7.  |      |            |                  |                                                                         |                                   |                                                  |                            |                                                        |                                                             |                                 |                     |                                          |                     |                                |                                                     |                          |                          |                                   |                            |                       |  |
| 8.  |      |            |                  |                                                                         |                                   |                                                  |                            |                                                        |                                                             |                                 |                     |                                          |                     |                                |                                                     |                          |                          |                                   |                            |                       |  |
| 9.  |      |            |                  |                                                                         |                                   |                                                  |                            |                                                        |                                                             |                                 |                     |                                          |                     |                                |                                                     |                          |                          |                                   |                            |                       |  |
| 10. |      |            |                  |                                                                         |                                   |                                                  |                            |                                                        |                                                             |                                 |                     |                                          |                     |                                |                                                     |                          |                          |                                   |                            |                       |  |

\*\*01 = Head, 02 = Spouse, 03 = Son /Daughter, 04 = Son-in-law/ Daughter-in-law, 05 = Grandchild, 06 = Parent, 07 = Parent-in-law, 08 = Sibling-in-law, 09 = Other relative, 10 =Adopted/ foster/ stepchild, 11 = not related 12=housekeeper, 13= Brother/Sister 77 = DK

| CHARACTERISTICS OF SOCIOECONOMY                                         |                                                                                                                                                |                                                                       |                     |       |
|-------------------------------------------------------------------------|------------------------------------------------------------------------------------------------------------------------------------------------|-----------------------------------------------------------------------|---------------------|-------|
| DO NOT READ THE OPTION OF ANSWER UNLESS THERE IS A SPECIFIC INSTRUCTION |                                                                                                                                                |                                                                       |                     |       |
|                                                                         | Indicator                                                                                                                                      | Value                                                                 | Points              | Score |
| 108                                                                     | থানায় ১২ বছর বা তার নিচের বয়সের সদস্য সংখ্যা কত?                                                                                             | A. তিন বা তার বেশী<br>B. দুই<br>C. এক<br>D. কোনটিই নয়                | 0<br>10<br>16<br>29 |       |
| 109                                                                     | আপনার পরিবারের ৬ থেকে ১২ বছরের সকল সদস্য কি বর্তমানে বিদ্যালয়ে বা শিক্ষা প্রতিষ্ঠানে যান?                                                     | A. না<br>B. ৬ থেকে ১২ বছরের কেউ নাই<br>C. হ্যাঁ                       | 0<br>3<br>6         |       |
| 110                                                                     | গত এক বছরে আপনার পরিবারের কোন সদস্য কি কখনও দৈনিক মজুরির ভিত্তিতে কাজ করেছেন?                                                                  | A. হ্যাঁ<br>B. না                                                     | 0<br>8              |       |
| 111                                                                     | আপনার পরিবারে কতগুলো কক্ষ আছে? (ব্যবসার উদ্দেশ্যে ব্যবহৃত কক্ষ বাদ দিয়ে)                                                                      | A. এক<br>B. দুই<br>C. তিন বা অধিক                                     | 0<br>3<br>5         |       |
| 112                                                                     | বাড়ির প্রধান কক্ষের দেয়াল নির্মাণে ব্যবহৃত প্রধান উপাদান কি?                                                                                 | A. খড়/বাঁশ, বা অন্যান্য<br>B. টিন, কার্ট,<br>C. ইট / সিমেন্ট/ কফ্রিট | 0<br>2<br>9         |       |
| 113                                                                     | আপনার পরিবারে কোন টেলিভিশন আছে?                                                                                                                | A. না<br>B. হ্যাঁ                                                     | 0<br>7              |       |
| 114                                                                     | আপনার পরিবারে কতগুলো বৈদ্যুতিক পাখা আছে?                                                                                                       | A. একটিও না<br>B. এক<br>C. দুই বা অধিক                                | 0<br>4<br>7         |       |
| 115                                                                     | আপনার পরিবারে কতগুলো নিজস্ব মোবাইল ফোন আছে?                                                                                                    | A. একটিও না<br>B. এক<br>C. দুই বা অধিক                                | 0<br>8<br>15        |       |
| 116                                                                     | পরিবারে কোন নিজস্ব বাই-সাইকেল/ মোটর/ সাইকেল/রিকশা/ভ্যান/ স্কুটার অথবা মোটর কার আছে কি?                                                         | A. না<br>B. হ্যাঁ                                                     | 0<br>4              |       |
| 117                                                                     | আপনার পরিবারে কি নিজস্ব (যেমন ভাড়া, ভাগের ফসল, বন্ধক,) ৫১ বা তার অধিক ডেসিমেল চাষযোগ্য কৃষিজমি আছে? (অনাবাদী জমি, নিজ বাড়ি ও উঠান বাদ দিয়ে) | A. না<br>B. হ্যাঁ                                                     | 0<br>7              |       |

বিঃদ্রঃ পিপি আই খুজে পি পি আই এর স্কোরবোর্ড থেকে মোট স্কোর ব্যবহার করুন।

118 was deleted

|                                                                                                                                                                                                                                                |  |
|------------------------------------------------------------------------------------------------------------------------------------------------------------------------------------------------------------------------------------------------|--|
| TICK HERE IF CONTINUATION SHEET USED                                                                                                                                                                                                           |  |
| Just to make sure that I have a complete listing:                                                                                                                                                                                              |  |
| Are there any other persons such as small children or infants that we have not listed?<br>(If YES Go back to household schedule and enter new members in the household schedule.)                                                              |  |
| In addition, are there any other people who may not be members of your family, such as domestic servants, lodgers or friends who usually live here?<br>(If YES Go back to household schedule and enter new members in the household schedule.) |  |

| SI           | Questions                                                                 | Code                |       |    | SI |
|--------------|---------------------------------------------------------------------------|---------------------|-------|----|----|
| 119          | আপনার খানায় কি কি আছে ?<br>(বর্তমানে যেখানে বসবাসরত)<br><br>(পড়ে শোনান) |                     | হ্যাঁ | না |    |
|              |                                                                           | বিদ্যুৎ             | 1     | 2  |    |
|              |                                                                           | সচল রেডিও           | 1     | 2  |    |
|              |                                                                           | সচল টেলিভিশন        | 1     | 2  |    |
|              |                                                                           | মোবাইল ফোন          | 1     | 2  |    |
|              |                                                                           | রেফ্রিজারেটর/ ফ্রিজ | 1     | 2  |    |
|              |                                                                           | সাইকেল              | 1     | 2  |    |
|              |                                                                           | মটর সাইকেল          | 1     | 2  |    |
|              |                                                                           | গাড়ি অথবা ট্রাক    | 1     | 2  |    |
|              |                                                                           | রিক্সা /ভ্যান       | 1     | 2  |    |
| DVD প্লেয়ার | 1                                                                         | 2                   |       |    |    |

| Household member, occupation and income<br>If mess- only record individual's income |             |                      |                                |                                                                                                                                                                                                                                                                              |                                                                                                   |                                                                                                  |                                                                                                                                                  |
|-------------------------------------------------------------------------------------|-------------|----------------------|--------------------------------|------------------------------------------------------------------------------------------------------------------------------------------------------------------------------------------------------------------------------------------------------------------------------|---------------------------------------------------------------------------------------------------|--------------------------------------------------------------------------------------------------|--------------------------------------------------------------------------------------------------------------------------------------------------|
| Line No                                                                             | 101         | 120a                 | 120b                           | 120c                                                                                                                                                                                                                                                                         | 120d                                                                                              | 120f                                                                                             | 120g and h                                                                                                                                       |
|                                                                                     | নাম         | বর্তমানে কর্মরত কিনা | পেশা ((পেশার কোড ব্যবহার করুন) | আয় (যেকোন একটি উত্তর হতে পারে<br>a) দিন এর গড় আয়, এবং মাসে কত দিন কাজ করে<br>গড়ে মাসিক ইনকাম<br>If household all work together in a family business and don't know individual income, put all income in household head's line. Tick if represents whole household income | _____ টাকা প্রতিদিন<br>(গত মাসে কত দিন কাজ করেছিলেন ) ___ দিন<br><br>অথবা,<br><br>_____ মাসিক আয় | _____ টাকা প্রতিদিন<br>(গত মাসে কত দিন কাজ করেছিলেন ) ___ দিন<br><br>অথবা<br><br>_____ মাসিক আয় | Other source of Income & Amount in tk<br><br>1. Remittance (Once for a house)<br>2. Land<br>3. Pension<br>4. Rent<br>5. DPS Interest<br>6. Other |
| 1                                                                                   |             |                      |                                |                                                                                                                                                                                                                                                                              |                                                                                                   |                                                                                                  |                                                                                                                                                  |
| 2                                                                                   |             |                      |                                | <input type="checkbox"/>                                                                                                                                                                                                                                                     |                                                                                                   |                                                                                                  |                                                                                                                                                  |
| 3                                                                                   |             |                      |                                |                                                                                                                                                                                                                                                                              |                                                                                                   |                                                                                                  |                                                                                                                                                  |
| 4                                                                                   | অর্থ প্রেরণ |                      |                                | _____ টাকা<br>_____ মাসিক                                                                                                                                                                                                                                                    |                                                                                                   |                                                                                                  |                                                                                                                                                  |

121

পরবর্তী প্রশ্নটি কিভাবে আপনি পারিবারিক খরচ মিটিয়ে থাকেন সেই সম্পর্কে। কিভাবে আপনি পরিবারের প্রয়োজনীয় জিনিসপত্র কিনে থাকেন--প্রতিদিন  
--প্রতি সপ্তাহ  
--প্রতি মাস  
--এবং বছরে এক/দুই বার

নির্দেশনা

যদি মেস এর কারো কাছ থেকে তথ্য নেয়া হয় সেই ক্ষেত্রে তার মেস এ কি খরচ হয় সেই হিসাব নিতে হবে (গ্রাম এর বাড়ির নয়)

গড়ে আপনার খানার মাসিক ব্যয় কত?

(যদি কোন খরচ না থাকে তাহলে ০০ লিখুন)

(গড়ে শোনান)

(write daily/weekly/monthly as mentioned by respondent)

1a.যাতায়াত - \_\_\_\_\_ টাকা

1b.প্রতিদিনের খাবার(শাক-সবজি, মাছ, মাংস)-\_\_\_\_\_ টাকা

2a.ঋণ/সঞ্চয় শোধ - \_\_\_\_\_ টাকা

3a.খাবার যেগুলো জমা করে রাখা যায় (চাল/ডাল)-\_\_\_\_\_ টাকা

3b.শিক্ষা খাতে খরচ (বেতন,কাগজ, কলম, বই, পোশাক)-\_\_\_\_\_ টাকা

3c.নিয়মিত চিকিৎসা খরচ - \_\_\_\_\_ টাকা

3d. বাসা ভাড়া বাবদ -----

3e. গৃহের নিয়মিত খরচ (বিদ্যুৎ, পানি, জ্বালানি)-\_\_\_\_\_ টাকা

3f.মোবাইল খরচ - \_\_\_\_\_ টাকা

3g.আত্মীয়র র কাছে নিয়মিত ভাবে টাকা পাঠানো - \_\_\_\_\_ টাকা

4a.পোশাক-পরিচ্ছদ (জুতা,জামা, কাপড়)-\_\_\_\_\_ টাকা

4b.আসবাবপত্র (মোবাইল ফোন, ফ্রিজ, টেলিভিশন, ইত্যাদি )-\_\_\_\_\_ টাকা

4c.বড় ধরনের চিকিৎসা খরচ-\_\_\_\_\_ টাকা

4d.বিবিধ - \_\_\_\_\_ টাকা

Start Time: \_\_\_\_\_

End Time: \_\_\_\_\_

## Individual Respondent Module

এই মডিউলটি সকল উপযুক্ত তথ্য প্রদান কারীদের উপর পরিচালনা করুন।

নিচের খালি জায়গায় উত্তরদাতার নাম ও লাইন নাম্বার পূরণ করুন। আপনার নাম, নাম্বার, এবং তারিখ পূরণ করুন।

|                                                                                                                                                                          |                                                                               |
|--------------------------------------------------------------------------------------------------------------------------------------------------------------------------|-------------------------------------------------------------------------------|
| Case Line Number:<br>Case Age:<br>Respondent Line Number:<br>(if not the same person as the case)                                                                        | Interviewer Name: .....<br>Code: .....<br>Date of interview: ...../...../2013 |
| Relationship to the case:<br>Result of the individual interview<br>Completed.....1<br>Not at home ..... 2<br>Refused..... 3<br>Partly completed .....4<br>Disabled.....5 |                                                                               |

| Sl   | Questions                                                                             | Code                                                                                                                      | Skip To                                                                 |
|------|---------------------------------------------------------------------------------------|---------------------------------------------------------------------------------------------------------------------------|-------------------------------------------------------------------------|
| 201  | আপনি কতদিন যাবত এই শহরে বাস করছেন                                                     | A. নগরে কত মাস যাবত<br>আছেন<br>.....<br>জানিনা ..... 77                                                                   | B. এই Colony/ moholla/para<br>কত মাস যাবত আছেন _____<br>জানিনা ..... 77 |
| 202  | আপনার গ্রামের বাড়ি কোথায়? [ বিঃদ্রঃ জেলার নাম লিখুন ]                               | .....                                                                                                                     |                                                                         |
| 203  | বর্তমান বৈবাহিক অবস্থা<br>(যদি বিবাহিত হয় তবে পুনরায় বিয়ে করেছে কিনা নিশ্চিত করুন) | 1. বিবাহিত<br>2. আলাদা বসবাস<br>3. পরিত্যক্ত<br>4. তালাকপ্রাপ্ত<br>5. বিধবা/বিপল্লীক<br>6. অবিবাহিত<br>7. পুনরায় বিবাহিত |                                                                         |
| 204  | আপনি কি কখন ধর্মভিত্তিক শিক্ষা গ্রহণ করেছেন?                                          | 1. হ্যাঁ<br>2. না                                                                                                         |                                                                         |
| 204a | আপনি কি কোন সময় আনুষ্ঠানিক (স্কুল/মাদ্রাসা) শিক্ষা গ্রহণ করেছেন?                     | 1. হ্যাঁ<br>2. না                                                                                                         | 206                                                                     |
| 205  | আপনি সর্বোচ্চ কোন ক্লাস পাস করেছেন??                                                  | ক্লাস.....                                                                                                                |                                                                         |
| 206  | আপনি কতটা নিয়মিত খবরের কাগজ বা ম্যাগাজিন পড়েন?                                      | 1. প্রতিদিন<br>2. সপ্তাহে অন্তত একবার<br>3. অনিয়মিতভাবে<br>4. কখনই না                                                    |                                                                         |
| 207  | আপনি কতটা নিয়মিত রেডিও শুনেন?                                                        | 1. প্রতিদিন<br>2. সপ্তাহে অন্তত একবার<br>3. অনিয়মিতভাবে<br>4. কখনই না                                                    |                                                                         |
| 208  | আপনি সাধারণত কোন সময় রেডিও শুনেন?                                                    | 1. সকালে<br>2. দুপুরে<br>3. বিকালে/সন্ধ্যায়<br>4. রাতে                                                                   | 209                                                                     |
| 209  | আপনি কতটা নিয়মিত টেলিভিশন দেখেন?                                                     | 1. প্রতিদিন                                                                                                               |                                                                         |

| SI   | Questions                                                                                                                                                                                                                                      | Code                                                                                                                                                                                                                        | Skip To                          |
|------|------------------------------------------------------------------------------------------------------------------------------------------------------------------------------------------------------------------------------------------------|-----------------------------------------------------------------------------------------------------------------------------------------------------------------------------------------------------------------------------|----------------------------------|
|      |                                                                                                                                                                                                                                                | 2. সপ্তাহে অন্তত একবার<br>3. অনিয়মিতভাবে<br>4. কখনই না                                                                                                                                                                     | 211                              |
| 210  | আপনি সাধারণত কখন টেলিভিশন দেখেন?                                                                                                                                                                                                               | 1. সকালে<br>2. দুপুরে<br>3. বিকালে/সন্ধ্যায়<br>4. রাতে                                                                                                                                                                     |                                  |
| 211  | আপনার ধর্ম কি / আপনি কোন ধর্মের?                                                                                                                                                                                                               | 1. ইসলাম<br>2. হিন্দু / সনাতন ধর্ম<br>3. বৌদ্ধ<br>4. খ্রিস্টান<br>98. অন্যান্য (নির্দিষ্ট করে উল্লেখ করুন)-----                                                                                                             |                                  |
| 211a | আপনি কি কোন ক্ষুদ্র নৃতাত্তিক জনগোষ্ঠীর অন্তর্ভুক্ত??                                                                                                                                                                                          | 1. হ্যাঁ<br>2. না                                                                                                                                                                                                           |                                  |
| 212  | আপনার পেশা ...                                                                                                                                                                                                                                 | 1. প্রধান পেশা:<br>2. আনুষঙ্গিক/দ্বিতীয় পেশা:<br>(নিচে পেশার কোড দেখুন)                                                                                                                                                    |                                  |
| 213  | গত চার সপ্তাহে আপনি কি নগদ টাকার বিনিময়ে কোন কাজ করেছেন?<br>যদি ২১২ নং প্রশ্নে বেকার অথবা গৃহিনী উল্লেখ করা হয়।                                                                                                                              | 1. হ্যাঁ<br>2. না                                                                                                                                                                                                           | 216                              |
| 214  | যদি হ্যাঁ হয় তবে কাজটি কি বাসার ভিতরে না বাহিরে ছিল?                                                                                                                                                                                          | 1. ভিতরে / অভ্যন্তরে<br>2. বাহিরে                                                                                                                                                                                           |                                  |
| 215  | আপনি কি ধরনের কাজ করেছিলেন?                                                                                                                                                                                                                    | (নিচে পেশার কোড দেখুন)                                                                                                                                                                                                      |                                  |
| 216  | আপনার বাসা থেকে ১ কিঃমিঃ বা ১০-১৫ মিনিট পায়ে হাটা দূরত্বের মধ্যে কি কোন স্বাস্থ্য সেবা কেন্দ্র আছে?                                                                                                                                           | 1. হ্যাঁ<br>2. না<br>77.জানিনা                                                                                                                                                                                              | না অথবা<br>জানিনা হলে<br>219 যান |
| 217  | যদি থাকে সেটি কোন ধরনের সেবাদানকারী প্রতিষ্ঠান / স্বাস্থ্য সেবা কেন্দ্র?<br>1. সরকারী হাসপাতাল/ ক্লিনিক<br>2. এনজিও<br>3. প্রাইভেট হাসপাতাল/ ক্লিনিক<br>4. ফার্মেসী<br>5. ডাক্তারের চেম্বার<br>6. ট্রেডিসনাল/ আধ্যাত্মিক চিকিৎসক<br>77.জানি না | নাম লিখুন এবং কোড গুলো নির্বাচন করুন<br>A. _____ 1 2 3 4 5 6 77<br>B.. _____ 1 2 3 4 5 6 77<br>C. _____ 1 2 3 4 5 6 77<br>D. _____ 1 2 3 4 5 6 77<br>যদি আপনি না জানেন, তখন জানিনা উত্তরটি প্রযোজ্য।                        |                                  |
| 218  | আপনি কিভাবে এই স্বাস্থ্য সেবাদানকারী প্রতিষ্ঠান বা স্বাস্থ্য কেন্দ্র সম্পর্কে জানতে পেরেছেন?<br>(একাধিক উত্তর গ্রহণযোগ্য)                                                                                                                      | 1. পরিবার / বন্ধুবান্ধব<br>2. প্রতিবেশী<br>3. স্বাস্থ্যকর্মী<br>4. ফার্মাসিস্ট<br>5. ছাপান গণমাধ্যম<br>6. ইলেক্ট্রনিক গণমাধ্যম (টিভি, রেডিও)<br>7. সাইনবোর্ড<br>8. নিজ অভিজ্ঞতা<br>98. অন্যান্য (নির্দিষ্ট করে উল্লেখ করুন) |                                  |

Start Time: \_\_\_\_\_

End Time: \_\_\_\_\_

## Core Health Care Seeking Behavior Module, Chronic Diseases

Enter eligible case's line number form HH listing:

আমি এখন আপনার কাছে কিছু স্বাস্থ্য সমস্যা স্পর্কে জানতে চাই যেগুলোতে দীর্ঘদিন ধরে অথবা ঘন ঘন আক্রান্ত হচ্ছি

| SI    | Questions                                                                                                                                                                  | Code                                                                                                                                                                                                                                                                                                                   | Skip To                                         |
|-------|----------------------------------------------------------------------------------------------------------------------------------------------------------------------------|------------------------------------------------------------------------------------------------------------------------------------------------------------------------------------------------------------------------------------------------------------------------------------------------------------------------|-------------------------------------------------|
| 1_300 | Respondent line number                                                                                                                                                     |                                                                                                                                                                                                                                                                                                                        |                                                 |
| 2_300 | Relationship to the case                                                                                                                                                   | 1. Head-1<br>2. Spouse-2<br>3. Son /Daughter-3<br>4. Son-in-law/ Daughter-in-law-4<br>5. Grandchild-5<br>6. Parent-6<br>7. Parent-in-law-7<br>8. Sibling-in-law-8<br>9. Other relative-9<br>10. Adopted/ foster/ stepchild-10<br>11. Not related-11<br>12. Housekeeper-12<br>13. Brother/Sister<br>14. Self-<br>77. DK |                                                 |
| 301   | বর্তমানে আপনি/ আপনার বাচ্চা কি তিন মাসের অধিক কোন উপসর্গ লক্ষ্য করেছেন / স্বাস্থ্য সমস্যায় ভুগছেন? (probe for health problems)                                            | 1. হ্যাঁ<br>2. না                                                                                                                                                                                                                                                                                                      | If yes at any, continue. Otherwise, end module. |
| 302   | আপনি/ আপনার বাচ্চা কি ঘন ঘন কোনো স্বাস্থ্য সমস্যায় ভুগছেন? (probe for health problems such as migraine)                                                                   | 1. হ্যাঁ<br>2. না                                                                                                                                                                                                                                                                                                      |                                                 |
| 303   | আপনি/ আপনার বাচ্চা কি কোনো অক্ষমতায় ভুগছেন জার জন্য আপনাকে চিকিৎসা সেবা গ্রহন করতে হয়? (probe for disabilities)                                                          | 1. হ্যাঁ<br>2. না                                                                                                                                                                                                                                                                                                      |                                                 |
| 304   | 301-302 উল্লিখিত সমস্যা গুলোর একটি ও কি MBBS ডাক্তার দ্বারা নির্ণয় হয়েছে?<br><br>(নোট: অবশ্যই পাশ করা ডাক্তার হতে হবে, পল্লি চিকিৎসক বা ঔষধ বিক্রেতা দ্বারা নয়)         | 1. হ্যাঁ<br>2. না                                                                                                                                                                                                                                                                                                      |                                                 |
| 305   | যদি হ্যাঁ হয় রোগ গুলো কি ছিল?<br><br>(রেকর্ড ধারণ করুন)                                                                                                                   | _____<br>_____                                                                                                                                                                                                                                                                                                         |                                                 |
| 306   | গত ৩ মাসে কি কি ধরনের উপসর্গ / স্বাস্থ্য সমস্যায় ভুগেছেন?<br>(রেকর্ড ধারণ করুন, পুঙ্খানুপুঙ্খভাবে তালিকাভুক্ত করুন)<br><br>কতদিন যাবৎ আপনি এই স্বাস্থ্য সমস্যায় ভুগেছেন? | 1. _____   1. _____ (d/w/m)<br>2. _____   2. _____ (d/w/m)<br>3. _____   3. _____ (d/w/m)<br>4. _____   4. _____ (d/w/m)<br>5. _____   5. _____ (d/w/m)<br>6. _____   6. _____ (d/w/m)                                                                                                                                 |                                                 |
| 307   | এর ভেতর কোনটি সবচেয়ে গুরুতর সমস্যা ছিল? (রেকর্ড / ধারণ করুন)<br><br>**নিচের অসুস্থতা / উপসর্গের কোড গুলো ব্যবহার করুন                                                     | _____<br>( )<br>কোড                                                                                                                                                                                                                                                                                                    |                                                 |
| 308   | আপনার মতে এই সমস্যার কারণ কি ?<br>(একাধিক উত্তর গ্রহণযোগ্য)<br>(প্রয়োজনে সবচেয়ে গুরুতর স্বাস্থ্য সমস্যার কথা মনে করিয়ে দিন)                                             | 1. বয়স<br>2. বাসায় কাজ করা<br>3. পেশা<br>4. দুর্ঘটনা<br>5. সংক্রামক<br>6. বংশগত<br>7. আশেপাশের পরিবেশ<br>77. জানি না<br>98. অন্যান্য (নির্দিষ্ট করে উল্লেখ করুন) _____                                                                                                                                               |                                                 |



| SI  | Questions                                                                                                                                                                                                | Code                                                                                                                                                                                                                                                                                                                                                                                                                                                                                                                                       | Skip To                                                              |
|-----|----------------------------------------------------------------------------------------------------------------------------------------------------------------------------------------------------------|--------------------------------------------------------------------------------------------------------------------------------------------------------------------------------------------------------------------------------------------------------------------------------------------------------------------------------------------------------------------------------------------------------------------------------------------------------------------------------------------------------------------------------------------|----------------------------------------------------------------------|
| 309 | এই স্বাস্থ্য সমস্যার জন্য আপনি কি করতে পারেন<br>(পড়ে শোনান)<br>কোড:<br>১= সহজেই / ১৬ আনা<br>২= সামান্য সমস্যা হয় / ১২ আনা,<br>৩= খুব সমস্যা হয় / ৮ আনা,<br>৪= কোন কাজই করতে পারিনা / মোটেও না / ০ আনা | A. নিজে নিজে খাওয়া..... ১ ২ ৩ ৪<br>B. ভারী ওজন উঠানো..... ১ ২ ৩ ৪<br>C. ১ কিঃমিঃ হাটা..... ১ ২ ৩ ৪<br>D. নোয়া, উবু হওয়া, হাটু গেড়ে বসা..... ১ ২ ৩ ৪<br>E. কারো সাহায্য ছাড়া কাপড় পড়া ..... ১ ২ ৩ ৪<br>F. সাহায্য ছাড়া বাথরুমে যাও..... ১ ২ ৩ ৪<br>G. সাহায্য ছাড়াই বসা অবস্থান থেকে<br>দাঁড়ানো..... ১ ২ ৩ ৪<br>H. সাহায্য ছাড়াই মাটিতে বসা অবস্থা থেকে দাঁড়ান<br>..... ১ ২ ৩ ৪<br>I. ঘরের টুকটাকি কাজ কর/স্কুলে / কাজে যাওয়া<br>..... ১ ২ ৩ ৪                                                                                 |                                                                      |
| 310 | আপনার এই স্বাস্থ্য সমস্যার জন্য আপনি কি কোন সেবা, পরামর্শ বা চিকিৎসা নিয়েছিলেন?<br>( বিঃদ্রঃ নিজ চিকিৎসা করে থাকলে হ্যাঁ হিসেবে বিবেচিত হবে)                                                            | 1. হ্যাঁ<br>2. না                                                                                                                                                                                                                                                                                                                                                                                                                                                                                                                          | 313                                                                  |
| 311 | আপনি কেন এই অসুস্থতা / অক্ষমতার জন্য কোন সেবা গ্রহন করেননি?<br>(একাধিক উত্তর গ্রহনযোগ্য)                                                                                                                 | 1. ভেবেছি নিজে নিজে ভাল হয়ে যাবে<br>2. গুরুতর ছিলনা<br>3. নিরাময়যোগ্য নয়<br>4. যাতায়াত খরচ বেশী<br>5. অনেক দূরে, কোন যানবাহন নেই<br>6. সেবাকেন্দ্রের দুর্বল নিরাপত্তা ব্যবস্থা<br>7. নিরাপত্তাহীন ভ্রমণ / যাতায়াত<br>8. সেবাসমূহ অতিরিক্ত ব্যয়বহল<br>9. সেবাকেন্দ্রে কোন মহিলা সেবা প্রদানকারী নেই<br>10. কর্মচারীদের অবস্কুসুলভ আচরণ<br>11. সেবা প্রদানের সময় সুবিধাজনক নয়<br>12. ধর্মীয়/সামাজিক বিশ্বাস<br>13. সাথে যাওয়ার মতো কেউ নেই<br>14. কোথায় যেতে হবে জানতেন না<br>15. টাকা নেই<br>98. অন্যান্য ( নির্দিষ্ট করুন)----- |                                                                      |
| 312 | আপনি অসুস্থ হলে চিকিৎসা গ্রহণের/না গ্রহণের সিদ্ধান্ত কে নেয়?<br>(একাধিক উত্তর গ্রহনযোগ্য)                                                                                                               | 1. নিজে<br>2. স্বামী / স্ত্রী<br>3. বাবা / মা<br>4. শশুড়ী<br>5. স্বশ্রম<br>6. পরিবারের অন্যান্য সদস্য<br>98. অন্যান্য ( নির্দিষ্ট করুন)-----                                                                                                                                                                                                                                                                                                                                                                                              | যদি ৩১১ এর উত্তর না হয় মডিউল শেষ করুন। And go to mobile use section |
| 313 | প্রশ্ন ৩০৬ এ তালিকাভুক্ত সমস্যাগুলর মধ্যে কোনwU (কোনগু#লার) জন্য আপনি শেষবার পরামর্শ বা সেবা নিয়েছিলেন?<br>(রেকর্ড করুন)                                                                                |                                                                                                                                                                                                                                                                                                                                                                                                                                                                                                                                            |                                                                      |
| 314 | শেষবার আপনার এই অসুস্থতা বা স্বাস্থ্য সমস্যার জন্য আপনি কোথায় কাছে গিয়েছিলেন?<br>(একাধিক উত্তর হতে পারে)                                                                                               | 1. নিজেই চিকিৎসা করেছিলেন<br>2. প্রতিবেশী<br>3. বাসায় সেবা গ্রহন<br>4. ফার্মেসী<br>5. সরকারী হাসপাতাল<br>6. প্রাইভেট ক্লিনিক/ হাসপাতাল<br>7. ডাক্তারের চেম্বার<br>8. এনজিও ক্লিনিক<br>98. অন্যান্য (নির্দিষ্ট করে লিখুন )                                                                                                                                                                                                                                                                                                                 |                                                                      |

| Sl   | Questions                                                                                               | Code                                                                                                                                                                                                                                                                                                                                                                      | Skip To |
|------|---------------------------------------------------------------------------------------------------------|---------------------------------------------------------------------------------------------------------------------------------------------------------------------------------------------------------------------------------------------------------------------------------------------------------------------------------------------------------------------------|---------|
| 314a | শেষবার আপনার এই অসুস্থতা বা স্বাস্থ্য সমস্যার জন্য আপনি কোথায় কাছে গিয়েছিলেন?<br>(most important one) | 1.নিজেই চিকিৎসা করেছিলেন<br>2.প্রতিবেশী<br>3. বাসায় সেবা গ্রহন<br>4. ফার্মেসী<br>5. সরকারী হাসপাতাল<br>6. প্রাইভেট ক্লিনিক/ হাসপাতাল<br>7. ডাক্তারের চেম্বার<br>8. এনজিও ক্লিনিক<br>98. অন্যান্য (নির্দিষ্ট করে লিখুন )                                                                                                                                                  |         |
| 315  | শেষবার আপনার এই অসুস্থতা বা স্বাস্থ্য সমস্যার জন্য আপনি কার কাছে গিয়েছিলেন?<br>(একাধিক উত্তর হতে পারে) | 1.নিজেই<br>2. প্রতিবেশী (যিনি কোন স্বাস্থ্য সেবা প্রদানকারী নন)<br>3. ফার্মাসিস্ট/গ্রাম ডাক্তার<br>4. সনাতন চিকিৎসা(কবিরাজ, ফকির, ইমাম, ওঝা, হুয়ুর)<br>5.হোমিওপ্যাথিক ডাক্তার<br>6. MBBS ডাক্তার<br>7.স্বাস্থ্য কর্মী<br>8.মোবাইলের মাধ্যমে চিকিৎসা<br>a. ট্রেডিশনাল ডাক্তার<br>b. হোমিও ডাক্তার<br>c. এলোপ্যাথ ডাক্তার<br>98. অন্যান্য (নির্দিষ্ট করে উল্লেখ করুন)_____ |         |
| 315a | শেষবার আপনার এই অসুস্থতা বা স্বাস্থ্য সমস্যার জন্য আপনি কার কাছে গিয়েছিলেন?<br>(most important one)    | 1.নিজেই<br>2. প্রতিবেশী (যিনি কোন স্বাস্থ্য সেবা প্রদানকারী নন)<br>3. ফার্মাসিস্ট/গ্রাম ডাক্তার<br>4. সনাতন চিকিৎসা(কবিরাজ, ফকির, ইমাম, ওঝা, হুয়ুর)<br>5.হোমিওপ্যাথিক ডাক্তার<br>6. MBBS ডাক্তার<br>7.স্বাস্থ্য কর্মী<br>8.মোবাইলের মাধ্যমে চিকিৎসা<br>a. ট্রেডিশনাল ডাক্তার<br>b. হোমিও ডাক্তার<br>c. এলোপ্যাথ ডাক্তার<br>98. অন্যান্য (নির্দিষ্ট করে উল্লেখ করুন)_____ |         |
| 316  | আপনি কিভাবে জানতে পেরেছিলেন যে এই অসুস্থতার জন্য আপনাকে কোথায় যেতে হবে / কি করতে হবে?*                 | 1.নিজের অভিজ্ঞতা থেকে<br>2.স্বামী / স্ত্রী<br>3. পরিবারের অন্য সদস্য থেকে<br>4. বন্ধু/সহকর্মী<br>5. প্রতিবেশী<br>6. অন্য পরিচিত<br>7. নিকটস্থ ফার্মেসী থেকে<br>8. অন্য ডাক্তার এর মাধ্যমে<br>9. কোন মোবাইল স্বাস্থ্য লাইনের সাথে পরামর্শ করে<br>10. স্বাস্থ্যকর্মী<br>98. অন্যান্য (উল্লেখ করুন)_____                                                                     |         |
| 316a | আপনি কিভাবে জানতে পেরেছিলেন যে এই অসুস্থতার জন্য আপনাকে কোথায় যেতে হবে / কি করতে হবে?*                 | 1.নিজের অভিজ্ঞতা থেকে<br>2.স্বামী / স্ত্রী<br>3. পরিবারের অন্য সদস্য থেকে<br>4. বন্ধু/সহকর্মী<br>5. প্রতিবেশী<br>6. অন্য পরিচিত<br>7. নিকটস্থ ফার্মেসী থেকে<br>8. অন্য ডাক্তার এর মাধ্যমে<br>9. কোন মোবাইল স্বাস্থ্য লাইনের সাথে পরামর্শ করে<br>10. স্বাস্থ্যকর্মী                                                                                                        |         |

| SI   | Questions                                                                                                                                                                                                                                                         | Code                                                                                                                                                                                                                                                                                                                                                                                                                                                                                                                                                | Skip To |
|------|-------------------------------------------------------------------------------------------------------------------------------------------------------------------------------------------------------------------------------------------------------------------|-----------------------------------------------------------------------------------------------------------------------------------------------------------------------------------------------------------------------------------------------------------------------------------------------------------------------------------------------------------------------------------------------------------------------------------------------------------------------------------------------------------------------------------------------------|---------|
| 317  | আপনি কেন এই সেবা প্রদানকারীকে / সেবাকেন্দ্রকে বেছে নিয়েছিলেন? *<br>(একাধিক উত্তর গ্রহণযোগ্য)                                                                                                                                                                     | 98. অন্যান্য (উল্লেখ করুন) _____<br>1. বাসার কাছে<br>2. স্বাস্থ্য সেবা প্রদানকারীর বন্ধুসুলভ আচরণ<br>3. পরিষ্কার পরিচ্ছন্ন<br>4. সশ্রমী/ কম খরচ/ক্রি চিকিৎসা<br>5. টাকা নেই<br>6. ঔষধ সহজেই পাওয়া যায়<br>7. অন্যের পরামর্শের জন্য<br>8. ব্যক্তিগত গোপনীয়তা রক্ষা করা হয়<br>9. মহিলা ডাক্তার উপস্থিতি<br>10. পাশ করা/বিশেষজ্ঞ ডাক্তার<br>11. বিশেষ দক্ষতা (যেমন হোমিওপ্যাথিক ডাক্তার)<br>12. কার্যকর চিকিৎসা<br>13. পূর্বের অভিজ্ঞতা থেকে<br>14. পরে পরিশোধ করতে পারবো (চিকিৎসা বা সেবার জন্য)<br>98. অন্যান্য (নির্দিষ্ট করে উল্লেখ করুন) _____ |         |
| 317a | আপনি কেন এই সেবা প্রদানকারীকে / সেবাকেন্দ্রকে বেছে নিয়েছিলেন? *<br>(most important one)                                                                                                                                                                          | 1. বাসার কাছে<br>2. স্বাস্থ্য সেবা প্রদানকারীর বন্ধুসুলভ আচরণ<br>3. পরিষ্কার পরিচ্ছন্ন<br>4. সশ্রমী/ কম খরচ/ক্রি চিকিৎসা<br>5. টাকা নেই<br>6. ঔষধ সহজেই পাওয়া যায়<br>7. অন্যের পরামর্শের জন্য<br>8. ব্যক্তিগত গোপনীয়তা রক্ষা করা হয়<br>9. মহিলা ডাক্তার উপস্থিতি<br>10. পাশ করা/বিশেষজ্ঞ ডাক্তার<br>11. বিশেষ দক্ষতা (যেমন হোমিওপ্যাথিক ডাক্তার)<br>12. কার্যকর চিকিৎসা<br>13. পূর্বের অভিজ্ঞতা থেকে<br>14. পরে পরিশোধ করতে পারবো (চিকিৎসা বা সেবার জন্য)<br>98. অন্যান্য (নির্দিষ্ট করে উল্লেখ করুন) _____                                     |         |
| 318  | আপনি এই অসুস্থতার জন্য কতবার স্বাস্থ্যসেবা প্রদানকারীকে দেখিয়েছেন?<br>(skip if self treatment: Q 316 option 1)                                                                                                                                                   | 98. অন্যান্য (নির্দিষ্ট করে উল্লেখ করুন) _____<br>1. প্রতি মাসে বা বেশী<br>2. প্রতি ২ -3 মাস<br>3. প্রায়ই 4-5 মাস<br>4. বছরে এক বা দুইবার<br>5. বছরে একবারের কম<br>98. অন্যান্য (উল্লেখ করুন) _____                                                                                                                                                                                                                                                                                                                                                |         |
| 319  | শেষবার চিকিৎসা নেয়ার সময় আপনাকে কত টাকা খরচ করতে হয়েছিল?<br>(skip if self treatment: Q 316 option 1)<br><br>(প্রত্যেক খরচ সম্বন্ধে আলাদা আলাদা করে জিজ্ঞেস করমন, যদি উত্তরদাতা আলাদা আলাদা কও উত্তর দিতে অড়াম হয়, তাহলে মোট খরচ কত হয়েছিল তা জিজ্ঞেস করমন।) | 1. যাতায়াত খরচ-<br>2. রেজিস্ট্রেশন ফি-<br>3. ডাক্তারের ফি/হসপাতাল খরচ-<br>4. ল্যাবের পরীক্ষা সমূহ-<br>5. মেডিসিন খরচ সরবরাহ -<br>6. অলিখিত খরচ (ঘুষ)<br>7. অলিখিত খরচ (বকশিস)<br>8. প্যাকেজ খরচ-<br>9. অন্যান্য-<br>10. মোট খরচ-<br>11. কোন টাকা লাগেনি<br>77. জানি না                                                                                                                                                                                                                                                                             |         |
| 320  | আপনি কিভাবে এই চিকিৎস্যা খরচ মিটিয়েছিলেন?                                                                                                                                                                                                                        | 1. পারিবারিক আয় থেকে<br>2. পারিবারিক সঞ্চয় থেকে<br>3. সম্পদ বিক্রি করে<br>4. ঋণ গ্রহন করে (ন জি ও)<br>5. ঋণ গ্রহন করে (স্থানীয় মহাজন থেকে)                                                                                                                                                                                                                                                                                                                                                                                                       |         |

| Sl  | Questions                                                                           | Code                                                                                                                                                                  | Skip To |
|-----|-------------------------------------------------------------------------------------|-----------------------------------------------------------------------------------------------------------------------------------------------------------------------|---------|
| 321 | আপনি চিকিৎস্যা বাবদ মাসে কত টাকা খরচ করে থাকেন? (ঔষধ, ডাঃ ফি, যাতায়াত, ইত্যাদি সহ) | 6.অনুদান গ্রহন করে (প্রতিবেশী/বন্ধু/আত্মীয়)<br>7.অনুদান গ্রহন করে (ন জি ও)<br>৮. ঋণ গ্রহন (প্রতিবেশী, আত্মীয়, বন্ধু)<br>98. অন্যান্য( উল্লেখ করুন)<br><br>-----টাকা |         |
