# Supplementary material for: Healthcare seeking for chronic illness among adult slum dwellers in Bangladesh: A descriptive cross-sectional study in two urban settings
Source: PubMed Central journal article supplement (PMC7295220; doi:10.1371/journal.pone.0233635), 2020-06-15
Supplement: pone.0233635.s002.pdf [file pone.0233635.s002.pdf]

Healthcare Seeking Behavior among the urban poor in Bangladesh, 2013

Indicate the result of the household survey in the household listing provided  
 “\*” Signifies multiple response for a question.

| HOUSEHOLD IDENTIFICATION                                                                                                                                                                                                                                                         |                                                  |                      |
|----------------------------------------------------------------------------------------------------------------------------------------------------------------------------------------------------------------------------------------------------------------------------------|--------------------------------------------------|----------------------|
| City Corporation:.....<br>Cluster Number.....<br>Household Number.....<br>Type of Household: 1. Family 2. Mess<br>Name of The Household Head.....<br>Name of The Respondent.....                                                                                                 | Household GPS Location:<br><br>_____             |                      |
| INTERVIEW DETAILS                                                                                                                                                                                                                                                                |                                                  |                      |
| Interviewer Code:<br>Result<br>1 <sup>st</sup> Visits:    /    /    Start Time:    :    End Time:    :<br>2 <sup>nd</sup> Visits: ___ / ___ / ___ Start Time: ___ : ___ End Time: ___ : ___<br>3 <sup>rd</sup> Visits: ___ / ___ / ___ Start Time: ___ : ___ End Time: ___ : ___ | Interview Completed<br>1. Yes<br>2. No           |                      |
| Cross Checker: _____                                                                                                                                                                                                                                                             | Date of Cross Check: ___ / ___ / ___             |                      |
| Supervisor: _____<br><br>Date: ___ / ___ / ___                                                                                                                                                                                                                                   | Field Editor: _____<br><br>Date: ___ / ___ / ___ | Remarks<br><br>_____ |

**Healthcare Seeking Behavior Among the Urban Poor in Bangladesh, 2013**  
**Screening Questionnaire for Household Membership Listing**

**\*Eligibility Criteria (Code):**

1= Individual Respondent Module (For All)

2= Health Care Seeking Behavior Module (15 yr and Above)

3= Not Eligible

| SL  | 101  | 102        | 103               | 104                                                                     | 105                                      | 106                                              | 106a                       | 107                                                    | 107a                                                        | 107b                            | 107b_1              | 107c                                     | 107c_1              | 107d                           | 107e                                                | 107f                  | 107g                         | 107h                              | 107i                       | 107j                 |  |
|-----|------|------------|-------------------|-------------------------------------------------------------------------|------------------------------------------|--------------------------------------------------|----------------------------|--------------------------------------------------------|-------------------------------------------------------------|---------------------------------|---------------------|------------------------------------------|---------------------|--------------------------------|-----------------------------------------------------|-----------------------|------------------------------|-----------------------------------|----------------------------|----------------------|--|
|     | Name | Sex        | Age               | Marital Status                                                          | Relation to the Household Head**         | Mother who has delivered baby within last 1 Year | Are you currently pregnant | Mother/Guardian who has living child age under 5 years | Mother/Guardian who has living child age between 5-14 years | Health problem for last 14 days | Specify the Disease | Health problem for last 3 months or more | Specify the Disease | Any physical/mental disability | If yes, have you sought treatment in last 3 months? | Unable speak or hear? | Eligibility for Module *     | Available in HH for next 2 weeks? | Available Appointment Time | Eligible for module* |  |
|     |      | 1=M<br>2=F | ----/-----<br>y/m | 1. Married<br>2. Separated<br>3. Divorced<br>4. Widowed<br>5. Unmarried | <i>See the options below the table**</i> | 1=Yes<br>2=No<br>3= NA                           | 1=Yes<br>2=No              | 1=Yes<br>2=No<br>3= NA                                 | 1=Yes<br>2=No<br>3= NA                                      | 1=Yes<br>2=No<br>3= NA          |                     | 1=Yes<br>2=No<br>3= NA                   |                     | 1=Yes<br>2=No                  | 1=Yes<br>2=No                                       | 1=Yes<br>2=No         | <i>See the Codes above *</i> |                                   |                            |                      |  |
| 1.  |      |            |                   |                                                                         |                                          |                                                  |                            |                                                        |                                                             |                                 |                     |                                          |                     |                                |                                                     |                       |                              |                                   |                            |                      |  |
| 2.  |      |            |                   |                                                                         |                                          |                                                  |                            |                                                        |                                                             |                                 |                     |                                          |                     |                                |                                                     |                       |                              |                                   |                            |                      |  |
| 3.  |      |            |                   |                                                                         |                                          |                                                  |                            |                                                        |                                                             |                                 |                     |                                          |                     |                                |                                                     |                       |                              |                                   |                            |                      |  |
| 4.  |      |            |                   |                                                                         |                                          |                                                  |                            |                                                        |                                                             |                                 |                     |                                          |                     |                                |                                                     |                       |                              |                                   |                            |                      |  |
| 5.  |      |            |                   |                                                                         |                                          |                                                  |                            |                                                        |                                                             |                                 |                     |                                          |                     |                                |                                                     |                       |                              |                                   |                            |                      |  |
| 6.  |      |            |                   |                                                                         |                                          |                                                  |                            |                                                        |                                                             |                                 |                     |                                          |                     |                                |                                                     |                       |                              |                                   |                            |                      |  |
| 7.  |      |            |                   |                                                                         |                                          |                                                  |                            |                                                        |                                                             |                                 |                     |                                          |                     |                                |                                                     |                       |                              |                                   |                            |                      |  |
| 8.  |      |            |                   |                                                                         |                                          |                                                  |                            |                                                        |                                                             |                                 |                     |                                          |                     |                                |                                                     |                       |                              |                                   |                            |                      |  |
| 9.  |      |            |                   |                                                                         |                                          |                                                  |                            |                                                        |                                                             |                                 |                     |                                          |                     |                                |                                                     |                       |                              |                                   |                            |                      |  |
| 10. |      |            |                   |                                                                         |                                          |                                                  |                            |                                                        |                                                             |                                 |                     |                                          |                     |                                |                                                     |                       |                              |                                   |                            |                      |  |

\*\*01 = Head, 02 = Spouse, 03 = Son /Daughter, 04 = Son-in-law/ Daughter-in-law, 05 = Grandchild, 06 = Parent, 07 = Parent-in-law, 08 = Sibling-in-law, 09 = Other relative, 10 =Adopted/ foster/ stepchild, 11 = not related 12=housekeeper, 13= Brother/Sister 77 = DK

| <b>SOCIOECONOMIC CHARACTERISTICS</b>                                    |                                                                                                                                                                                    |                                                                     |                     |       |
|-------------------------------------------------------------------------|------------------------------------------------------------------------------------------------------------------------------------------------------------------------------------|---------------------------------------------------------------------|---------------------|-------|
| DO NOT READ THE OPTION OF ANSWER UNLESS THERE IS A SPECIFIC INSTRUCTION |                                                                                                                                                                                    |                                                                     |                     |       |
|                                                                         | Indicator                                                                                                                                                                          | Value                                                               | Points              | Score |
| 108                                                                     | How many household members are 12-years-old or younger?                                                                                                                            | A. Three or more<br>B. Two<br>C. One<br>D. None                     | 0<br>10<br>16<br>29 |       |
| 109                                                                     | Do all household members aged 6-to-12 currently attend a school/educational institution?                                                                                           | A. No<br>B. No one 6-to-12<br>C. Yes                                | 0<br>3<br>6         |       |
| 110                                                                     | In the past year, did any household member ever do work for which he/she was paid on a daily basis?                                                                                | A. Yes<br>B. No                                                     | 0<br>8              |       |
| 111                                                                     | How many rooms does your household occupy (excluding rooms used for business)?                                                                                                     | A. One<br>B. Two<br>C. Three or more                                | 0<br>3<br>5         |       |
| 112                                                                     | What is the main construction material of the walls of the main room?                                                                                                              | A. hay/bamboo, or other<br>B. Tin/wood<br>C. Brick/cement/ Concrete | 0<br>2<br>9         |       |
| 113                                                                     | Does the household own any televisions?                                                                                                                                            | A. No<br>B. Yes                                                     | 0<br>7              |       |
| 114                                                                     | How many fans does the household own?                                                                                                                                              | A. None<br>B. One<br>C. Two or more                                 | 0<br>4<br>7         |       |
| 115                                                                     | How many mobile phones does the household own?                                                                                                                                     | A. None<br>B. One<br>C. Two or more                                 | 0<br>8<br>15        |       |
| 116                                                                     | Does the household own any bicycles, motorcycle/scooters, or motor cars etc.?                                                                                                      | A. No<br>B. Yes                                                     | 0<br>4              |       |
| 117                                                                     | Does the household own (or rent/sharecrop/mortgage in or out) 51 or more decimals of cultivable agricultural land (excluding uncultivable land and dwelling-house/homestead land)? | A. No<br>B. Yes                                                     | 0<br>7              |       |

Note: Using the Total Score find PPI from PPI scorecard.

|                                                                                                                                                                                                                                                |  |
|------------------------------------------------------------------------------------------------------------------------------------------------------------------------------------------------------------------------------------------------|--|
| TICK HERE IF CONTINUATION SHEET USED                                                                                                                                                                                                           |  |
| Just to make sure that I have a complete listing:                                                                                                                                                                                              |  |
| Are there any other persons such as small children or infants that we have not listed?<br>(If YES Go back to household schedule and enter new members in the household schedule.)                                                              |  |
| In addition, are there any other people who may not be members of your family, such as domestic servants, lodgers or friends who usually live here?<br>(If YES Go back to household schedule and enter new members in the household schedule.) |  |

| SI  | Questions                                                          | Code               |    | Skip To |  |
|-----|--------------------------------------------------------------------|--------------------|----|---------|--|
|     |                                                                    | YES                | NO |         |  |
| 119 | Does your household have: (read out)<br>(at the current residence) | ELECTRICITY        | 1  | 2       |  |
|     |                                                                    | WORKING RADIO      | 1  | 2       |  |
|     |                                                                    | WORKING TELEVISION | 1  | 2       |  |
|     |                                                                    | MOBILE TELEPHONE   | 1  | 2       |  |
|     |                                                                    | REFRIGERATOR       | 1  | 2       |  |
|     |                                                                    | BICYCLE            | 1  | 2       |  |
|     |                                                                    | MOTORCYCLE         | 1  | 2       |  |
|     |                                                                    | CAR OR TRUCK       | 1  | 2       |  |
|     |                                                                    | RICKSHAW/VAN       | 1  | 2       |  |
|     |                                                                    | DVD PLAYER         | 1  | 2       |  |

| Household Member Occupation and Income<br><i>If mess- only record individual's income</i> |                             |                                                                                                                             |                                                                                                                                                                                                  |                                              |                                               |                                                                 |                                                                                                                                                          |
|-------------------------------------------------------------------------------------------|-----------------------------|-----------------------------------------------------------------------------------------------------------------------------|--------------------------------------------------------------------------------------------------------------------------------------------------------------------------------------------------|----------------------------------------------|-----------------------------------------------|-----------------------------------------------------------------|----------------------------------------------------------------------------------------------------------------------------------------------------------|
| LINE NO.                                                                                  | 101<br>Select Member (name) | 120b<br>Are they working?<br><br>What is their occupation?<br><br>(Refer to occupation code)<br>Don't assume-prompt for all | 120c<br>Represents whole household<br>1=Yes<br>2=No<br><br><i>If household all work together in a family business and don't know individual income, put all income in household head's line.</i> | 120d<br>Income Type<br>1.Daily<br>2. Monthly | 120f<br>How many days did you work last month | 120g<br>Do you have Other source of Income<br><br>1=Yes<br>2=No | 120h<br>Other source of Income & Amount in tk<br><br>1. Remittance (Once for a house)<br>2. Land<br>3. Pension<br>4. Rent<br>5. DPS Interest<br>6. Other |
| 1.                                                                                        |                             |                                                                                                                             |                                                                                                                                                                                                  |                                              |                                               |                                                                 |                                                                                                                                                          |
| 2.                                                                                        |                             |                                                                                                                             |                                                                                                                                                                                                  |                                              |                                               |                                                                 |                                                                                                                                                          |
| 3.                                                                                        |                             |                                                                                                                             |                                                                                                                                                                                                  |                                              |                                               |                                                                 |                                                                                                                                                          |
| 4.                                                                                        |                             |                                                                                                                             |                                                                                                                                                                                                  |                                              |                                               |                                                                 |                                                                                                                                                          |
| 5.                                                                                        |                             |                                                                                                                             |                                                                                                                                                                                                  |                                              |                                               |                                                                 |                                                                                                                                                          |
| 6.                                                                                        |                             |                                                                                                                             |                                                                                                                                                                                                  |                                              |                                               |                                                                 |                                                                                                                                                          |
| 7.                                                                                        |                             |                                                                                                                             |                                                                                                                                                                                                  |                                              |                                               |                                                                 |                                                                                                                                                          |
| 8.                                                                                        |                             |                                                                                                                             |                                                                                                                                                                                                  |                                              |                                               |                                                                 |                                                                                                                                                          |
| 9.                                                                                        |                             |                                                                                                                             |                                                                                                                                                                                                  |                                              |                                               |                                                                 |                                                                                                                                                          |
| 10.                                                                                       |                             |                                                                                                                             |                                                                                                                                                                                                  |                                              |                                               |                                                                 |                                                                                                                                                          |

|     |                                                                                                                                                                                                                                                                                                                                                                                                                                                                                                                                     |                                                                                                                                                                                                                                                                                                                                                                                                                                                                                                                                                                                                                                                             |  |
|-----|-------------------------------------------------------------------------------------------------------------------------------------------------------------------------------------------------------------------------------------------------------------------------------------------------------------------------------------------------------------------------------------------------------------------------------------------------------------------------------------------------------------------------------------|-------------------------------------------------------------------------------------------------------------------------------------------------------------------------------------------------------------------------------------------------------------------------------------------------------------------------------------------------------------------------------------------------------------------------------------------------------------------------------------------------------------------------------------------------------------------------------------------------------------------------------------------------------------|--|
| 121 | <p>This next question asks about the different things that you have to pay for in your household. I'm interested in the things that you buy</p> <p>... every day<br/>... every week<br/>... every month<br/>... and about once a year</p> <p>Tab has been set to allow the interview to enter the time period volunteered by the respondent, then the taka spent in that time period.</p> <p>Instruction: If living in a mess – ensure they are answering for their OWN expenditure in the mess (and not in their village home)</p> | <p><b>(write daily/weekly/monthly as mentioned by respondent)</b></p> <p>1.a Transport<br/>1.b Daily food (vegetables, meat and fish)<br/>2.a Loan repayments<br/>3.a Food that can be stored (rice, dahl)<br/>3.b Educational costs (tuition, stationary, books, uniforms)<br/>3.c Regular medical expenses (medication)<br/>3.d House rent-<br/>3.e Housing and utilities (electricity, gas, water)<br/>3.f Mobile phone bills<br/>3.g Money that you send to relatives<br/>4.a Clothing and footwear<br/>4.b Furniture and electronics (mobile phone, television, etc)<br/>4.c Large medical expenses<br/>4.d Miscellaneous expenses (large one-off)</p> |  |
|-----|-------------------------------------------------------------------------------------------------------------------------------------------------------------------------------------------------------------------------------------------------------------------------------------------------------------------------------------------------------------------------------------------------------------------------------------------------------------------------------------------------------------------------------------|-------------------------------------------------------------------------------------------------------------------------------------------------------------------------------------------------------------------------------------------------------------------------------------------------------------------------------------------------------------------------------------------------------------------------------------------------------------------------------------------------------------------------------------------------------------------------------------------------------------------------------------------------------------|--|

|                                                                                                                                                                                 |                                                                    |
|---------------------------------------------------------------------------------------------------------------------------------------------------------------------------------|--------------------------------------------------------------------|
| <b>Start Time:</b> _____                                                                                                                                                        | <b>End Time:</b> _____                                             |
| <b>Individual Respondent Module</b>                                                                                                                                             |                                                                    |
| <i>This module is to be administered to all eligible respondents.</i>                                                                                                           |                                                                    |
| <i>Fill in the cluster and household number, and the name and line number of the individual in the space below. Fill in your name, number and the date.</i>                     |                                                                    |
| 1_200 Respondent Line Number:<br>2_200 Relationship to case:<br>3-200 Case Age:<br>4_200 Need for this module: 1- Yes, 2- No<br><br>Case Age:                                   | Interviewer Name.....<br>Code.....<br>Date of interview: .....2013 |
| Result of the individual interview<br>Completed.....1<br>Not at home ..... 2<br>Refused..... 3<br>Partly completed .....4<br>Disabled.....5<br>Other ( <i>specify</i> ) .....96 | City Corporation:<br><br>Cluster Number:<br><br>Household Number:  |

| NO.  | QUESTIONS                                                                            | CODE                                                                                                               | SKIP                                                             |     |
|------|--------------------------------------------------------------------------------------|--------------------------------------------------------------------------------------------------------------------|------------------------------------------------------------------|-----|
| 201  | How long have you been living continuously in this -                                 | <b>a. City Corporation</b><br>Completed months____<br>DK--77                                                       | <b>b. Colony/ moholla/para</b><br>Completed months____<br>DK--77 |     |
| 202  | Where is your home district?<br>Note: Write name                                     | _____                                                                                                              |                                                                  |     |
| 203  | Current marital status<br><br><b>(IF MARRIED PROBE FOR WHETHER REMARRIED OR NOT)</b> | 1. Married<br>2. Separated<br>3. Deserted<br>4. Divorced<br>5. Widowed/Widower<br>6. Never married<br>7. Remarried |                                                                  |     |
| 204a | Have you ever attended religious education?                                          | 1. Yes<br>2. No                                                                                                    |                                                                  |     |
| 204b | Have you ever attended formal education (school/madrasa)?                            | 1. Yes<br>2. No                                                                                                    |                                                                  | 206 |
| 205  | What is the highest class you completed?                                             | (Completed highest class) .....                                                                                    |                                                                  |     |
| 206  | How often do you read newspaper or magazine?                                         | 1. Every day<br>2. At least once a week<br>3. Infrequently<br>4. Never                                             |                                                                  |     |
| 207  | How often do you listen to the radio?                                                | 1. Every day<br>2. At least once a week<br>3. Infrequently<br>4. Never                                             |                                                                  | 209 |
| 208  | When do you usually listen to radio?                                                 | 1. Morning<br>2. Afternoon                                                                                         |                                                                  |     |

|      |                                                                                                                                                                                                                                                                                               |                                                                                                                                                                                         |                  |
|------|-----------------------------------------------------------------------------------------------------------------------------------------------------------------------------------------------------------------------------------------------------------------------------------------------|-----------------------------------------------------------------------------------------------------------------------------------------------------------------------------------------|------------------|
|      |                                                                                                                                                                                                                                                                                               | 3. Evening<br>4. Night                                                                                                                                                                  |                  |
| 209  | How often do you watch television?                                                                                                                                                                                                                                                            | 1. Every day<br>2. At least once a week<br>3. Infrequently<br>4. Never                                                                                                                  | 211              |
| 210  | When do you usually watch television?                                                                                                                                                                                                                                                         | 1. Morning<br>2. Afternoon<br>3. Evening<br>4. Night                                                                                                                                    |                  |
| 211  | What is your religion?                                                                                                                                                                                                                                                                        | 1. Islam<br>2. Hinduism<br>3. Buddhism<br>4. Christianity<br>98. Other (specify) _____                                                                                                  |                  |
| 211a | Do you belong to any minority ethnic group?                                                                                                                                                                                                                                                   | 1. Yes<br>2. No                                                                                                                                                                         |                  |
| 212  | What is your....                                                                                                                                                                                                                                                                              | a. principle occupation:<br>b. secondary occupation:<br><br>occupation code (see below)                                                                                                 |                  |
| 213  | Have you done any work for cash in the last four weeks?<br>Ask if mentioned unemployed or housewife in 212                                                                                                                                                                                    | 1. Yes<br>2. No                                                                                                                                                                         | 216              |
| 214  | Was this work inside or outside the home?                                                                                                                                                                                                                                                     | 1. Inside<br>2. Outside                                                                                                                                                                 |                  |
| 215  | What kind of work did you do?                                                                                                                                                                                                                                                                 | _____<br>occupation code (see below)                                                                                                                                                    |                  |
| 216  | Are there any health SERVICE PROVIDERS/FACILITIES available within 1 kilometer/10-15 minutes of walking distance from your home?                                                                                                                                                              | 1. Yes<br>2. No<br>77. DK                                                                                                                                                               | 219 for No OR DK |
| 217  | What health SERVICE PROVIDERS/FACILITIES are available within 1 kilometer/10-15 minutes of walking distance from your home?<br>CODE:<br>1. GOVT. Hospital/clinic<br>2. NGO<br>3. Private. Hospital/clinic<br>4. Pharmacy<br>5. Doctor's chamber<br>6. Traditional/spiritual healers<br>77. DK | Write Names & Select Code<br><br>A. _____ 1 2 3 4 5 6 77<br>B. _____ 1 2 3 4 5 6 77<br>C. _____ 1 2 3 4 5 6 77<br>D. _____ 1 2 3 4 5 6 77<br><br>(if don't know name, put "don't know") |                  |

|      |                                                                                       |                                                                                                                                                                                                                     |  |
|------|---------------------------------------------------------------------------------------|---------------------------------------------------------------------------------------------------------------------------------------------------------------------------------------------------------------------|--|
| 218  | How do you know about this/these facility/facilities, providers? *                    | 1. Family/friends<br>2. Neighbors<br>3. Health workers<br>4. Pharmacist<br>5. Print Media (News paper)<br>6. Electronic media (TV, Radio, etc.)<br>7. Signboard<br>8. Own experience<br>98. Other(specify) _____    |  |
|      |                                                                                       | 98.Other(specify) _____                                                                                                                                                                                             |  |
| 218a | How do you know about this/these facility/facilities, providers? (Most important one) | 1. Family/friends<br>2. Neighbors<br>3. Health workers<br>4. Pharmacist<br>5. Print Media (News paper)<br>6. Electronic media (TV, Radio, etc.)<br>7. Signboard<br>8. Own experience<br><br>98.Other(specify) _____ |  |

**Core Health Care Seeking Behavior Module (CHRONIC DISEASES)**

| NO.   | Now I would like to ask about any long-term or repeated health conditions you are experiencing                                                                                                                            | CODE                                                                                                                                                                                                                                                                                                                   |                                                                                                                                  | SKIP To                                         |
|-------|---------------------------------------------------------------------------------------------------------------------------------------------------------------------------------------------------------------------------|------------------------------------------------------------------------------------------------------------------------------------------------------------------------------------------------------------------------------------------------------------------------------------------------------------------------|----------------------------------------------------------------------------------------------------------------------------------|-------------------------------------------------|
| 1_300 | Respondent line number                                                                                                                                                                                                    |                                                                                                                                                                                                                                                                                                                        |                                                                                                                                  |                                                 |
| 2_300 | Relationship to the case                                                                                                                                                                                                  | 1. Head-1<br>2. Spouse-2<br>3. Son /Daughter-3<br>4. Son-in-law/ Daughter-in-law-4<br>5. Grandchild-5<br>6. Parent-6<br>7. Parent-in-law-7<br>8. Sibling-in-law-8<br>9. Other relative-9<br>10. Adopted/ foster/ stepchild-10<br>11. Not related-11<br>12. Housekeeper-12<br>13. Brother/Sister<br>14. Self-<br>77. DK |                                                                                                                                  |                                                 |
| 301   | Are you/your child currently suffering from a long-term health problem that has lasted more than three months?<br><br>Probe for health problems                                                                           | 1. Yes<br>2. No                                                                                                                                                                                                                                                                                                        |                                                                                                                                  | If yes at any, continue. Otherwise, end module. |
| 302   | Do you suffer from any health problem that comes and goes repeatedly (such as migraine)<br><br>Probe for health problems                                                                                                  | 1. Yes<br>2. No                                                                                                                                                                                                                                                                                                        |                                                                                                                                  |                                                 |
| 303   | Do you suffer from any disabilities that require medical treatment?<br><br>Probe for disabilities                                                                                                                         | 1. Yes<br>2. No                                                                                                                                                                                                                                                                                                        |                                                                                                                                  |                                                 |
| 304   | Have you been diagnosed (by an MBBS doctor) for any of these problem?<br><br>(note- must be qualified- not pharmacist or village doctor)                                                                                  | 1. Yes<br>2. No                                                                                                                                                                                                                                                                                                        |                                                                                                                                  |                                                 |
| 305   | (If yes) what were the diagnoses?<br>(record verbatim)                                                                                                                                                                    | _____<br>_____<br>_____                                                                                                                                                                                                                                                                                                |                                                                                                                                  |                                                 |
| 306   | What are the symptoms/health problems you have been experiencing for last three or more months?<br><br>For each- how long have you had these symptoms? (answered in days/weeks/months)<br><br>( record and list verbatim) | 1. _____<br>2. _____<br>3. _____<br>4. _____<br>5. _____<br>6. _____                                                                                                                                                                                                                                                   | 1. _____ (d/w/m/y)<br>2. _____ (d/w/m/y)<br>3. _____ (d/w/m/y)<br>4. _____ (d/w/m/y)<br>5. _____ (d/w/m/y)<br>6. _____ (d/w/m/y) |                                                 |
| 307   | Which one is the most severe symptom/health problem?<br>(record)                                                                                                                                                          | _____ ( _____ )<br>Code                                                                                                                                                                                                                                                                                                |                                                                                                                                  |                                                 |



|       |                                                                                                                                                                                                                                                                        |                                                                                                                                                                                                                                                                                                                                                                                                                                                                                                                           |                     |
|-------|------------------------------------------------------------------------------------------------------------------------------------------------------------------------------------------------------------------------------------------------------------------------|---------------------------------------------------------------------------------------------------------------------------------------------------------------------------------------------------------------------------------------------------------------------------------------------------------------------------------------------------------------------------------------------------------------------------------------------------------------------------------------------------------------------------|---------------------|
| 308   | <p>In your opinion what could be the causes of this symptom?*</p> <p>Note- remind referring to most severe symptom if necessary</p>                                                                                                                                    | <p>1. Age<br/> 2. Work at home<br/> 3. Occupation<br/> 4. Accident<br/> 5. Contagious<br/> 6. Family history/genetic<br/> 7. Living environment<br/> 77. DK<br/> 98. Other specify _____</p>                                                                                                                                                                                                                                                                                                                              |                     |
| 308_1 | <p>In your opinion what is the most important cause of this symptom?</p>                                                                                                                                                                                               | <p>1. Age<br/> 2. Work at home<br/> 3. Occupation<br/> 4. Accident<br/> 5. Contagious<br/> 6. Family history/genetic<br/> 7. Living environment<br/> 77. DK<br/> 98. Other specify _____</p>                                                                                                                                                                                                                                                                                                                              |                     |
| 308a  | <p>Age category</p>                                                                                                                                                                                                                                                    | <p>1. More than 14 years<br/> 2. 0-14 years</p>                                                                                                                                                                                                                                                                                                                                                                                                                                                                           |                     |
| 309   | <p>Due to this symptom are you able to <b>(READ OUT)</b></p> <p>Code:<br/> 1= Easily/16 ana,<br/> 2= With Slight Difficulty/12 ana,<br/> 3= With Much Difficulty/8 ana,<br/> 4= Not at all/0 ana</p> <p>Note- remind referring to most severe symptom if necessary</p> | <p>A. Feed yourself.....1 2 3 4<br/> B. Carry a heavy load.....1 2 3 4<br/> C. Walk 1 kilometer.....1 2 3 4<br/> D. Bow, squat, kneel.....1 2 3 4<br/> E. Dress without help.....1 2 3 4<br/> F. Go to the bathroom without help....1 2 3 4<br/> G. Stand up from a sitting position without help.....1 2 3 4<br/> H. Stand up from sitting on the floor without help.....1 2 3 4<br/> I. Perform household chores/ Attend school/work .....1 2 3 4</p>                                                                   |                     |
| 310   | <p>Did you seek any care, advice or treatment for any of your symptoms?<br/> (Note: Self care should be regarded as Yes. Refers to <i>any</i> of the symptoms mentioned at 306)</p>                                                                                    | <p>1. Yes<br/> 2. No</p>                                                                                                                                                                                                                                                                                                                                                                                                                                                                                                  | <p>313<br/> 312</p> |
| 311   | <p>Why didn't you seek care for this health problem or disability?*</p> <p>(skip if did seek treatment)</p>                                                                                                                                                            | <p>1. Thought would go away by itself<br/> 2. Not severe<br/> 3. Not curable<br/> 4. Transport too expensive<br/> 5. Too far, no transportation<br/> 6. Poor security at facility<br/> 7. Insecure travel<br/> 8. Services too expensive/cannot afford<br/> 9. No female provider at facility<br/> 10. Unfriendly staff<br/> 11. Inconvenient service hours<br/> 12. Religious or cultural belief<br/> 13. No one to accompany<br/> 14. Didn't know where to go<br/> 15. Lack of money<br/> 98. Others, specify _____</p> |                     |

|      |                                                                                                                      |                                                                                                                                                                                                                                                                                                                                                                                                                                                                                                 |                                       |
|------|----------------------------------------------------------------------------------------------------------------------|-------------------------------------------------------------------------------------------------------------------------------------------------------------------------------------------------------------------------------------------------------------------------------------------------------------------------------------------------------------------------------------------------------------------------------------------------------------------------------------------------|---------------------------------------|
| 312  | Who made the decision about seeking/not seeking treatment?*                                                          | <ol style="list-style-type: none"> <li>1. Self</li> <li>2. Spouse</li> <li>3. Parent</li> <li>4. Mother-in-law</li> <li>5. Father-in-law</li> <li>6. Other family members</li> <li>98.Others, specify: _____</li> </ol>                                                                                                                                                                                                                                                                         | If no at 311, finish chronic section. |
| 312a | Who made the decision about seeking/not seeking treatment? (Most important one)                                      | <ol style="list-style-type: none"> <li>1. Self</li> <li>2. Spouse</li> <li>3. Parent</li> <li>4. Mother-in-law</li> <li>5. Father-in-law</li> <li>6. Other family members</li> <li>7. 98.Others, specify: _____</li> </ol>                                                                                                                                                                                                                                                                      |                                       |
| 313  | For which one (or more) symptoms/health problems mentioned in Q 306 did you seek advice/care the last time? (record) | _____                                                                                                                                                                                                                                                                                                                                                                                                                                                                                           |                                       |
| 314  | Where did you go for this health problem the last time?*                                                             | <ol style="list-style-type: none"> <li>1. Self-treatment</li> <li>2. Neighbour</li> <li>3. Door step service</li> <li>4. Pharmacy</li> <li>5. Government hospital</li> <li>6. Private clinic / hospital</li> <li>7. Doctor's chamber</li> <li>8. NGO clinic</li> <li>98.Others, specify:</li> </ol>                                                                                                                                                                                             |                                       |
| 314a | Where did you go for this health problem the last time? (most important one)                                         | <ol style="list-style-type: none"> <li>1. Self-treatment</li> <li>2. Neighbour</li> <li>3. Door step service</li> <li>4. Pharmacy</li> <li>5. Government hospital</li> <li>6. Private clinic / hospital</li> <li>7. Doctor's chamber</li> <li>8. NGO clinic</li> <li>98.Others, specify:</li> </ol>                                                                                                                                                                                             |                                       |
| 315  | Who did you go to for this health problem the last time?*                                                            | <ol style="list-style-type: none"> <li>1. Self treatment</li> <li>2. Neighbor (not a health professional)</li> <li>3. Pharmacist /Village doctor</li> <li>4. Traditional healer</li> <li>5. Homeopath doctor</li> <li>6. MBBS doctor</li> <li>7. Community health worker (SK/CSBA)</li> <li>8. Over mobile phone <ol style="list-style-type: none"> <li>a. Traditional healer</li> <li>b. Homeopath doctor</li> <li>c. Allopath doctor</li> </ol> </li> <li>98.Others, specify _____</li> </ol> |                                       |
| 315a | Who did you go to for this health problem the last time? (most important one)                                        | <ol style="list-style-type: none"> <li>1. Self treatment</li> <li>2. Neighbor (not a health professional)</li> <li>3. Pharmacist /Village doctor</li> <li>4. Traditional healer</li> <li>5. Homeopath doctor</li> <li>6. MBBS doctor</li> <li>7. Community health worker (SK/CSBA)</li> <li>8. Over mobile phone <ol style="list-style-type: none"> <li>a. Traditional healer</li> <li>b. Homeopath doctor</li> <li>c. Allopath doctor</li> </ol> </li> <li>98.Others, specify</li> </ol>       |                                       |

|      |                                                                                                         |                                                                                                                                                                                                                                                                                                                                                                                                                                                                                                                                                                                     |  |
|------|---------------------------------------------------------------------------------------------------------|-------------------------------------------------------------------------------------------------------------------------------------------------------------------------------------------------------------------------------------------------------------------------------------------------------------------------------------------------------------------------------------------------------------------------------------------------------------------------------------------------------------------------------------------------------------------------------------|--|
| 316  | How did you know where to go/what to do for this problem(s)?*                                           | <ol style="list-style-type: none"> <li>1. From my own experience</li> <li>2. Spouse</li> <li>3. From other family members</li> <li>4. From friends/From colleagues</li> <li>5. From neighbours</li> <li>6. From other acquaintances</li> <li>7. From local pharmacy</li> <li>8. From another doctor (referral)</li> <li>9. Consultation with any mobile health line</li> <li>10. From a community health worker (SK)</li> <li>98. Others, specify: _____</li> </ol>                                                                                                                 |  |
| 316a | How did you know where to go/what to do for this problem(s)? (most important one)                       | <ol style="list-style-type: none"> <li>1. From my own experience</li> <li>2. Spouse</li> <li>3. From other family members</li> <li>4. From friends/From colleagues</li> <li>5. From neighbours</li> <li>6. From other acquaintances</li> <li>7. From local pharmacy</li> <li>8. From another doctor (referral)</li> <li>9. Consultation with any mobile health line</li> <li>10. From a community health worker (SK)</li> <li>98. Others, specify: _____</li> </ol>                                                                                                                 |  |
| 317  | Why did you choose this provider/facility?*                                                             | <ol style="list-style-type: none"> <li>1. Close to home</li> <li>2. Provider friendly</li> <li>3. Clean</li> <li>4. Low cost/ free</li> <li>5. Lack of money</li> <li>6. Medicines available</li> <li>7. Recommended by others</li> <li>8. Privacy maintained</li> <li>9. Female doctors available</li> <li>10. Qualified doctors (MBBS or specialist)</li> <li>11. Special skills (such as homeopathic doctor)</li> <li>12. Effective treatment</li> <li>13. Prior experience</li> <li>14. Can pay later (for medication, treatment)</li> <li>98. Others, specify _____</li> </ol> |  |
| 317a | Why did you choose this provider/facility? (most important one)                                         | <ol style="list-style-type: none"> <li>1. Close to home</li> <li>2. Provider friendly</li> <li>3. Clean</li> <li>4. Low cost/ free</li> <li>5. Lack of money</li> <li>6. Medicines available</li> <li>7. Recommended by others</li> <li>8. Privacy maintained</li> <li>9. Female doctors available</li> <li>10. Qualified doctors (MBBS or specialist)</li> <li>11. Special skills (such as homeopathic doctor)</li> <li>12. Effective treatment</li> <li>13. Prior experience</li> <li>14. Can pay later (for medication, treatment)</li> <li>98. Others, specify _____</li> </ol> |  |
| 318  | How often do you see a health provider for this health problem? (skip if self-treatment: Q316 option 1) | <ol style="list-style-type: none"> <li>1. Every month or more frequently</li> <li>2. Every 2-3 months</li> <li>3. Every 4-5 months</li> <li>4. 1-2 times a year</li> <li>5. Less than once a year</li> <li>98. Other, specify _____</li> </ol>                                                                                                                                                                                                                                                                                                                                      |  |

|     |                                                                                                                                                                                                                                  |                                                                                                                                                                                                                                                                                                                                                                                                                                                          |  |
|-----|----------------------------------------------------------------------------------------------------------------------------------------------------------------------------------------------------------------------------------|----------------------------------------------------------------------------------------------------------------------------------------------------------------------------------------------------------------------------------------------------------------------------------------------------------------------------------------------------------------------------------------------------------------------------------------------------------|--|
| 319 | <p>How much did you have to spend for the last visit?<br/>RECORD THE AMOUNT IN TAKA.</p> <p>ASK EACH ITEM SEPARATELY. IF A RESPONDENT IS UNABLE TO REMEMBER SEPARATELY HOW MUCH HE PAID FOR EACH ITEM, THEN ASK FOR A TOTAL.</p> | <ol style="list-style-type: none"> <li>1. Transport costs-----</li> <li>2. Registration fees-----</li> <li>3. Consultation/ hospitalization fees--</li> <li>4. Lab tests-----</li> <li>5. Medicine &amp; supplies-----</li> <li>6. Unofficial payments (bribes)-----</li> <li>7. Unofficial payments (tips)---</li> <li>8. Package treatment(expenses together)</li> <li>9. Other</li> <li>10. Total</li> <li>11. No expenses</li> <li>77. DK</li> </ol> |  |
| 320 | How did you pay for this?*                                                                                                                                                                                                       | <ol style="list-style-type: none"> <li>1. From household wages</li> <li>2. Savings</li> <li>3. Selling household objects</li> <li>4. Borrowing money from NGO</li> <li>5. Borrowing money from money lender</li> <li>6. Donation from a neighbor, friend or relative</li> <li>7. Donation from NGO</li> <li>8. Borrowing money form family/relative/friend</li> <li>98. OTHERS(SPECIFY) _____</li> </ol>                                                 |  |
| 320 | How did you pay for this? (most important on                                                                                                                                                                                     | <ol style="list-style-type: none"> <li>1. From household wages</li> <li>2. Savings</li> <li>3. Selling household objects</li> <li>4. Borrowing money from NGO</li> <li>5. Borrowing money from money lender</li> <li>6. Donation from a neighbor, friend or relative</li> <li>7. Donation from NGO</li> <li>8. Borrowing money form family/relative/friend</li> <li>98.OTHERS(SPECIFY) _____</li> </ol>                                                  |  |
| 321 | How much do you spend monthly for medicines, consultation, and supplies to address this health problem (including transport costs and all doctor's fees)?                                                                        | _____ Taka                                                                                                                                                                                                                                                                                                                                                                                                                                               |  |
